# Supplementary material for: In vitro and in vivo photothermally enhanced chemotherapy by single-walled carbon nanohorns as a drug delivery system
Source: Royal Society of Chemistry journal article supplement (doi:10.1039/c4tb00249k), 2014-01-01
Supplement: c4tb00249k1.pdf [file c4tb00249k1.pdf]

## Supporting Information

### *In Vitro* and *In Vivo* Photothermally Enhanced Chemotherapy by Single-Walled Carbon Nanohorns as a Drug Delivery System

Daiqin Chen, Chao Wang, Feng Jiang, Zhuang Liu, Chunying Shu\*, and Lijun Wan\*

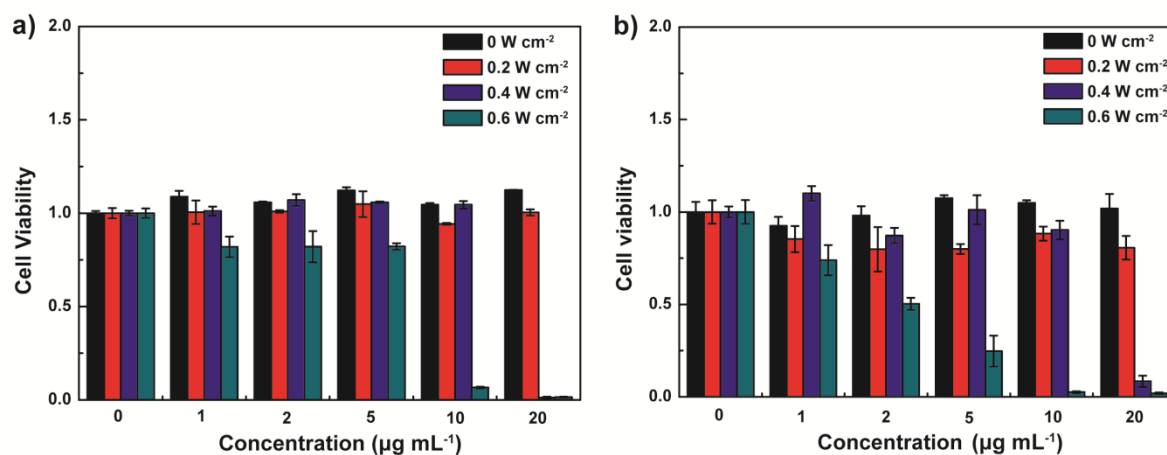

**Figure S1.** Viability of 4T1 cells incubated with either SWNHs/DCA-HPCHS (a) or DOX-SWNHs/DCA-HPCHS (b) with an 808 nm laser irradiation at a series of power density ( $0 \text{ W cm}^{-2}$ ,  $0.2 \text{ W cm}^{-2}$ ,  $0.4 \text{ W cm}^{-2}$  and  $0.6 \text{ W cm}^{-2}$ ).

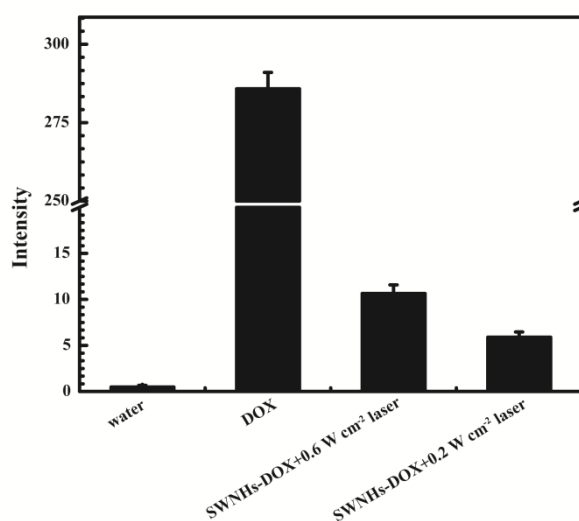

**Figure S2.** The fluorescence intensity of water, free DOX and DOX-SWNHs/DCA-HPCHS with an 808 nm laser irradiation at either 0.2 W cm<sup>-2</sup> or 0.6 W cm<sup>-2</sup>.

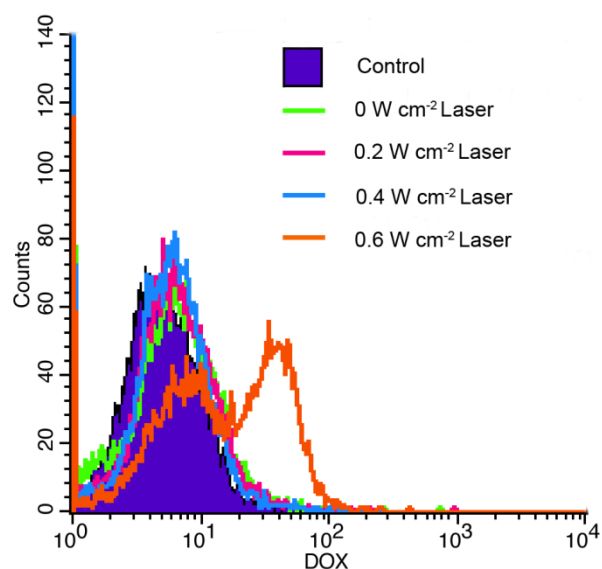

**Figure S3.** Flow cytometry of 4T1 cells incubated with DOX-SWNHs/DCA-HPCHS exposed to 808 nm laser irradiation at a series of power densities (0 W cm<sup>-2</sup>, 0.2 W cm<sup>-2</sup>, 0.4 W cm<sup>-2</sup> and 0.6 W cm<sup>-2</sup>).

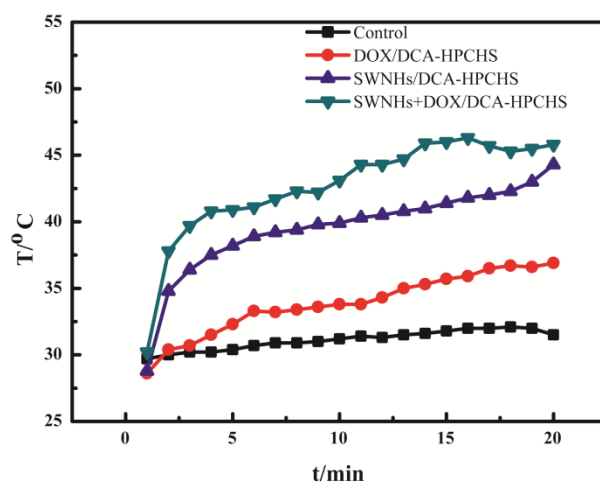

**Figure S4.** The temperature elevation on the surface of tumors of mice.

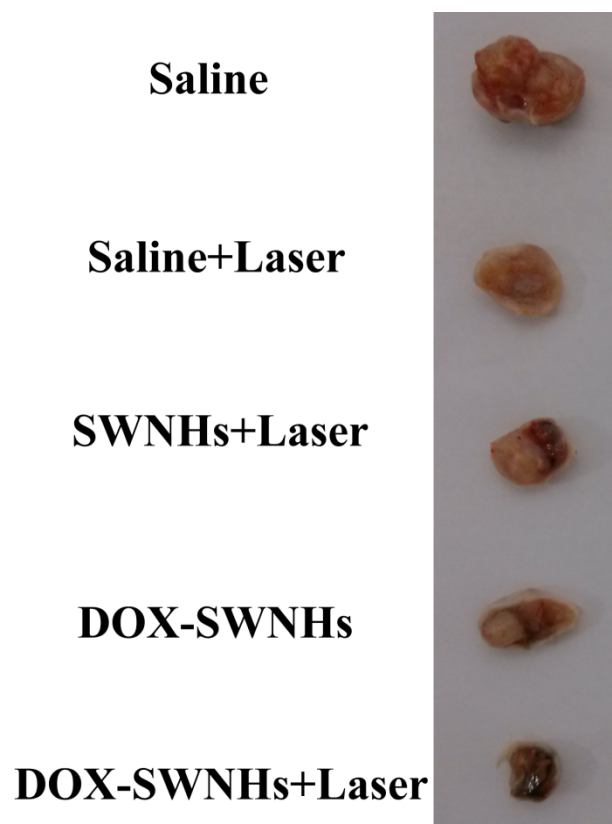

**Figure S5.** Tumor photographs of the five treated groups.
